# Supplementary material for: Comparative analysis of assembly algorithms to optimize biosynthetic gene cluster identification in novel marine actinomycete genomes
Source: Frontiers journal article supplement (doi:10.3389/fmars.2022.914197), 2022-07-29

**Supplementary Table 1. Observed growth inhibition of active extracts against *M. tuberculosis* H37Ra and associated actinomycete strains.**

| Strain ID                                 | Clearance Zone v. <i>M. tuberculosis</i> H37Ra |                |
|-------------------------------------------|------------------------------------------------|----------------|
|                                           | [25 ug/ disk]                                  | [250 ug/ disk] |
| <i>Micrococcus</i> sp. strain XM4230A     | +                                              | ++++           |
| <i>Micrococcus</i> sp. strain XM4230B     | ++                                             | ++++           |
| <i>Micromonospora</i> sp. strain R42003   | +                                              | ++             |
| <i>Micromonospora</i> sp. strain R42004   | +                                              | ++             |
| <i>Micromonospora</i> sp. strain R42106   | -                                              | ++             |
| <i>Micromonospora</i> sp. strain XM-20-01 | +                                              | ++             |
| <i>Brevibacterium</i> sp. strain R8603A2  | -                                              | ++             |
| <i>Brevibacterium</i> sp. strain XM4083   | -                                              | ++             |
| <i>Streptomyces</i> sp. strain XM4011     | +                                              | ++             |
| <i>Streptomyces</i> sp. strain XM83C      | ++++                                           | ++++           |
| <i>Streptomyces</i> sp. strain XM4193     | +                                              | +++            |
| DMSO Control                              | -                                              | -              |

Legend: - (no growth inhibition observed), + (radius  $\leq$  1mm), ++ (1mm < radius  $\leq$  2mm), +++ (2mm < radius  $\leq$  5mm), ++++ (radius > 5mm)

Supplementary Figure 1. Genome dot plot comparing *Micrococcus* spp. strains XM4230A and XM4230B.

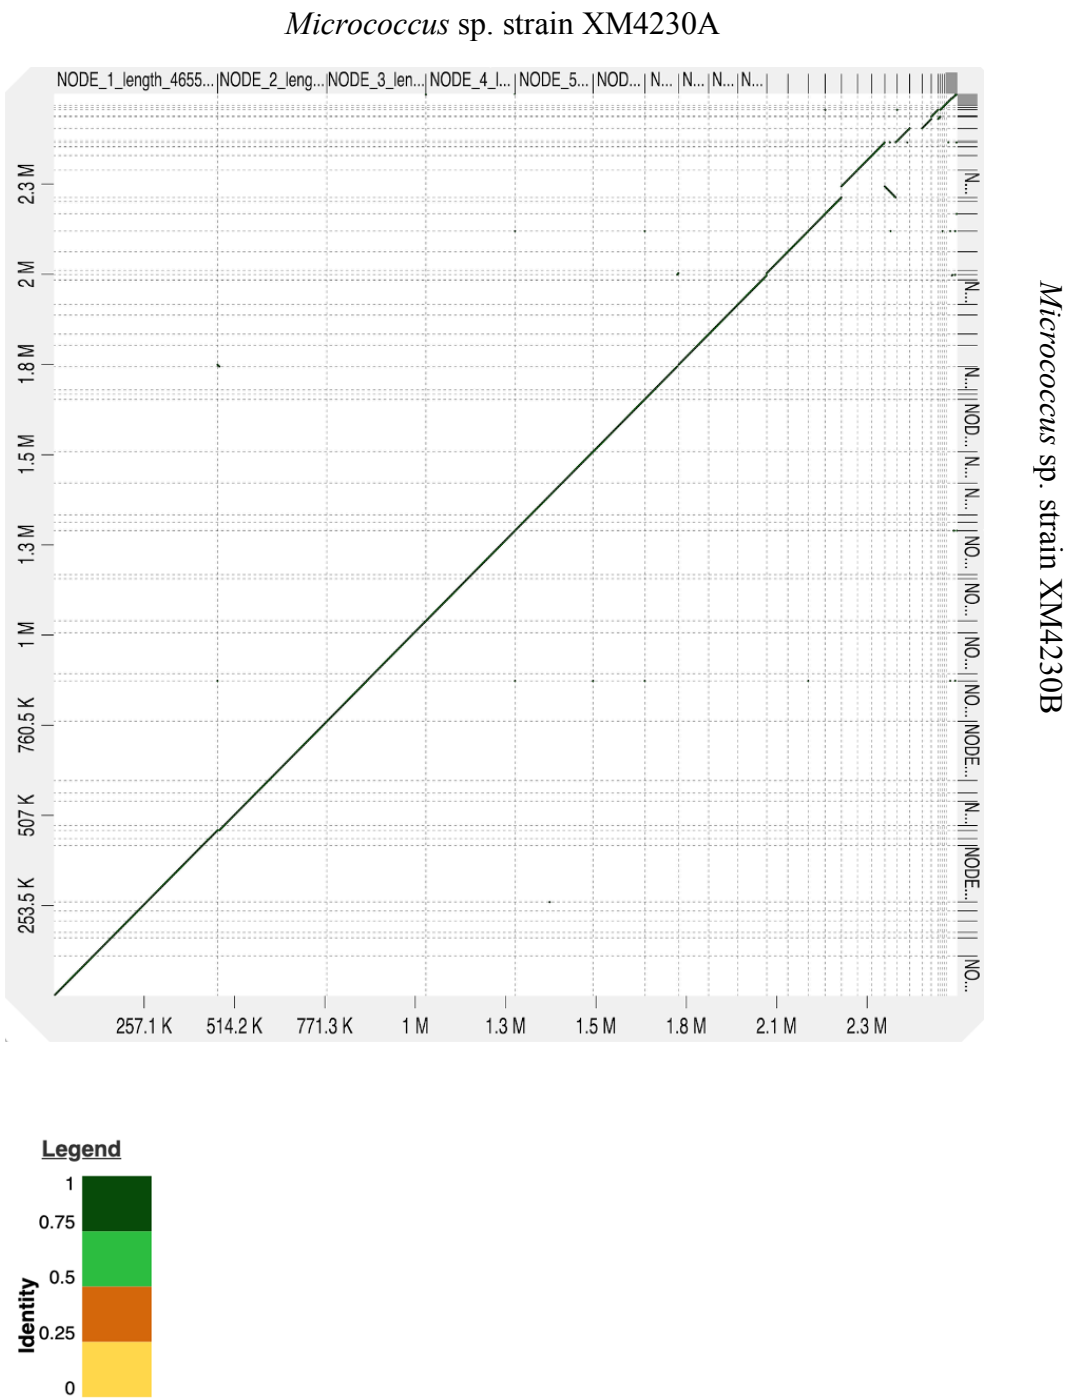

Supplementary Figure 2. Genome dot plot comparing *Micromonospora* spp. strains R42106 and XM-20-01.

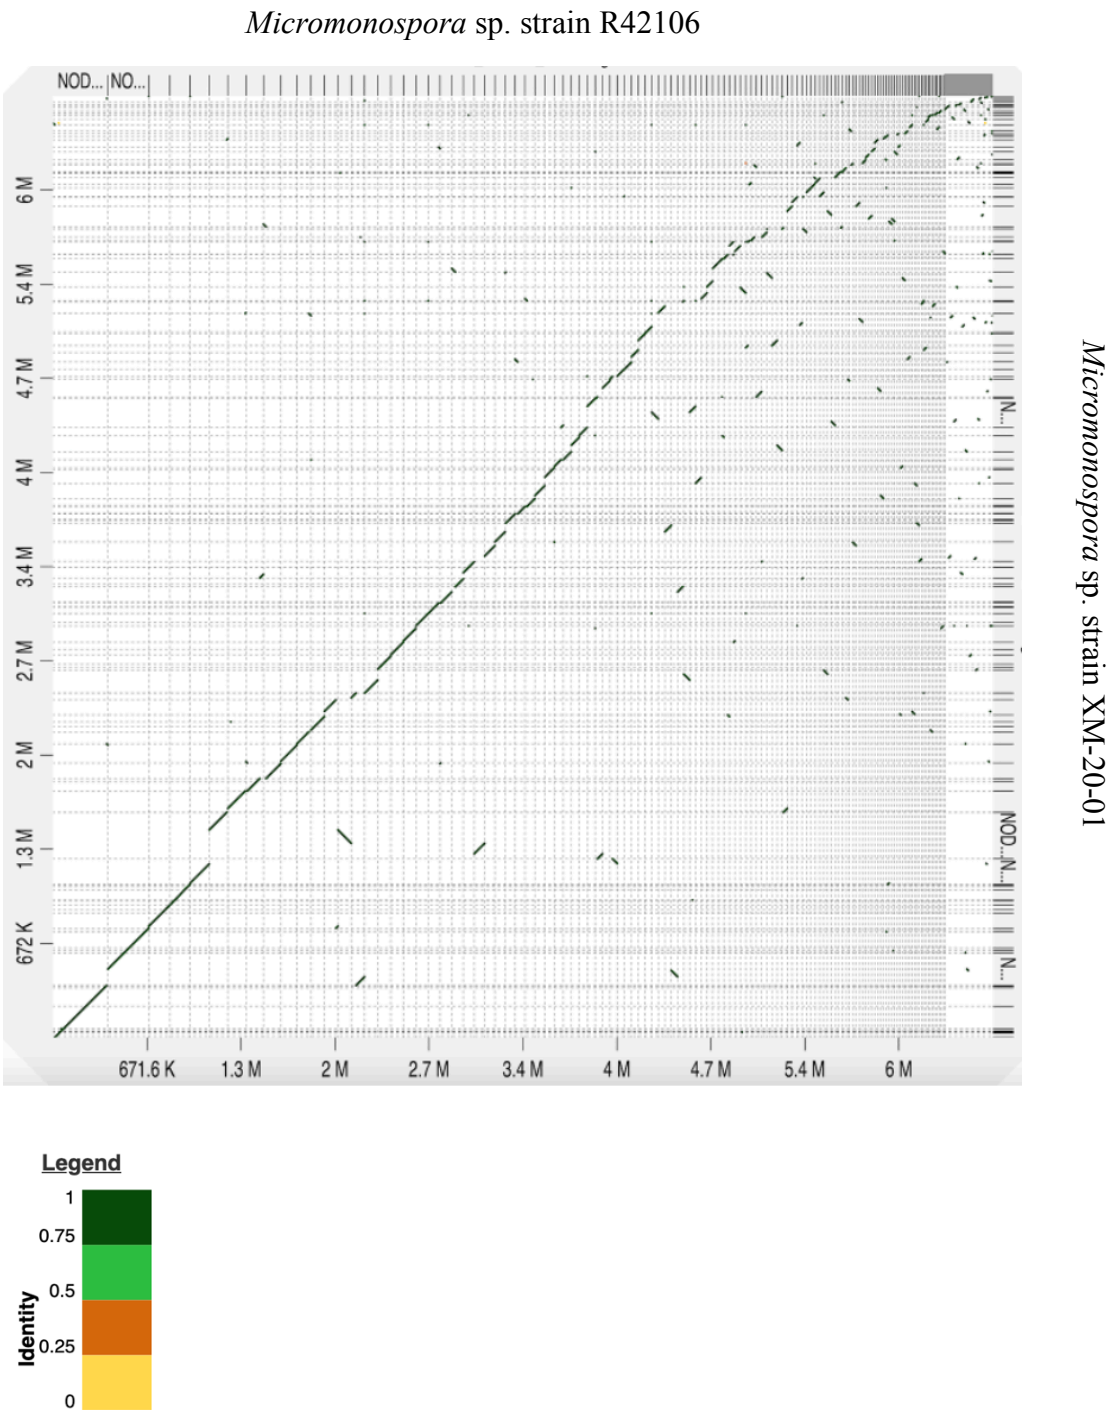

Supplementary Figure 3. Genome dot plot comparing *Micromonospora* spp. strains R42004 and XM-20-01.

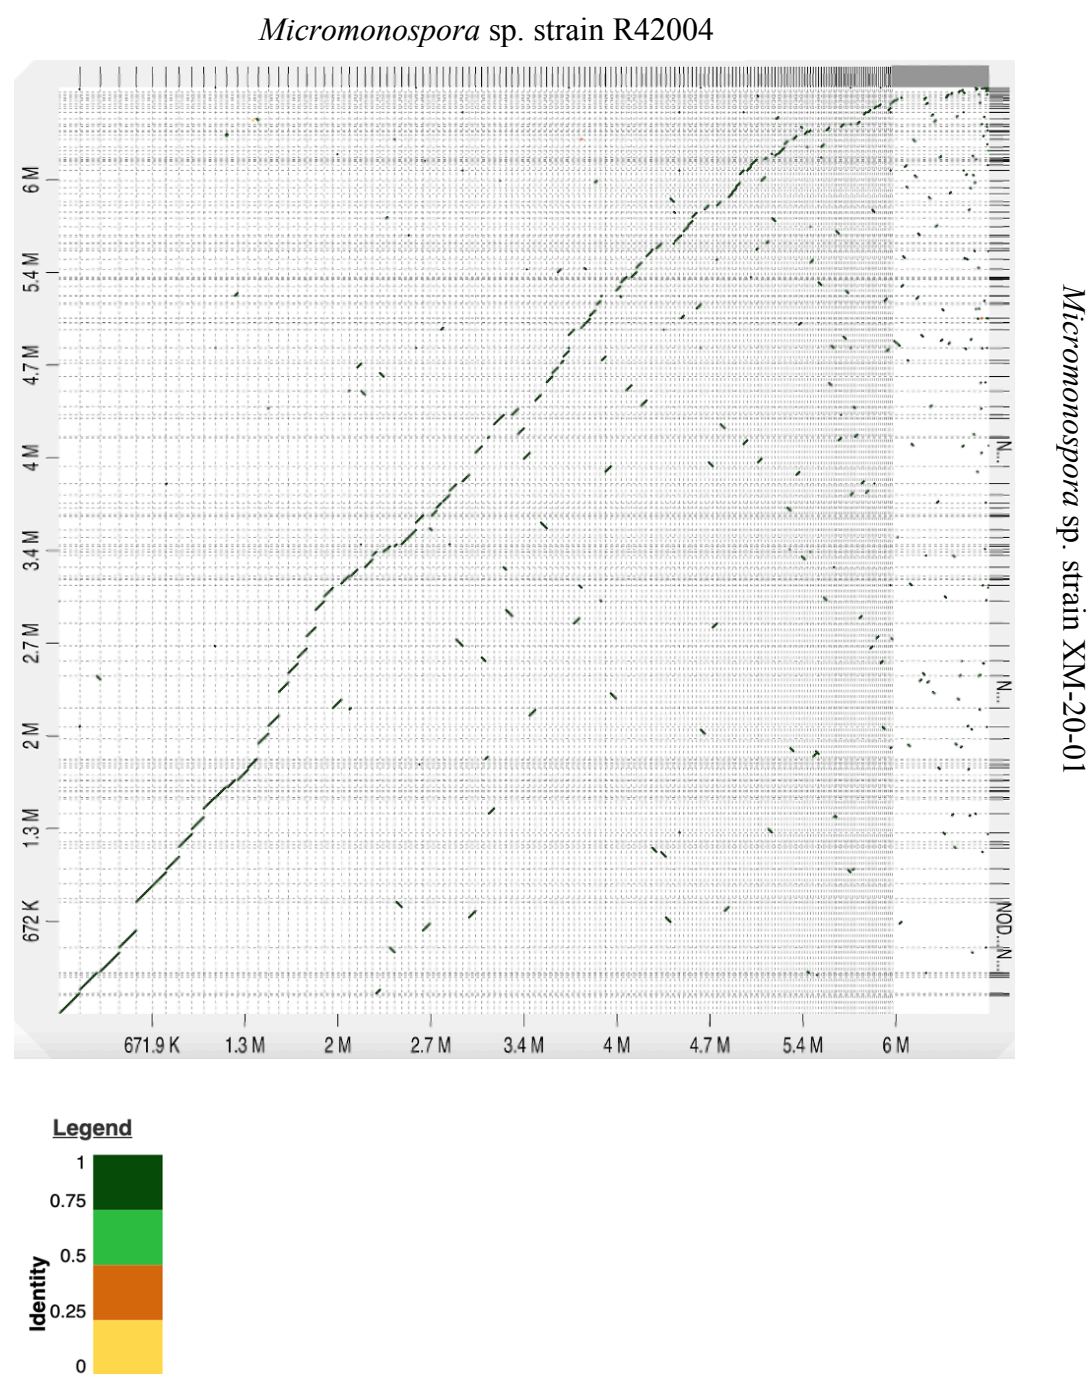

Supplementary Figure 4. Genome dot plot comparing *Micromonospora* spp. strains R42004 and R42106.

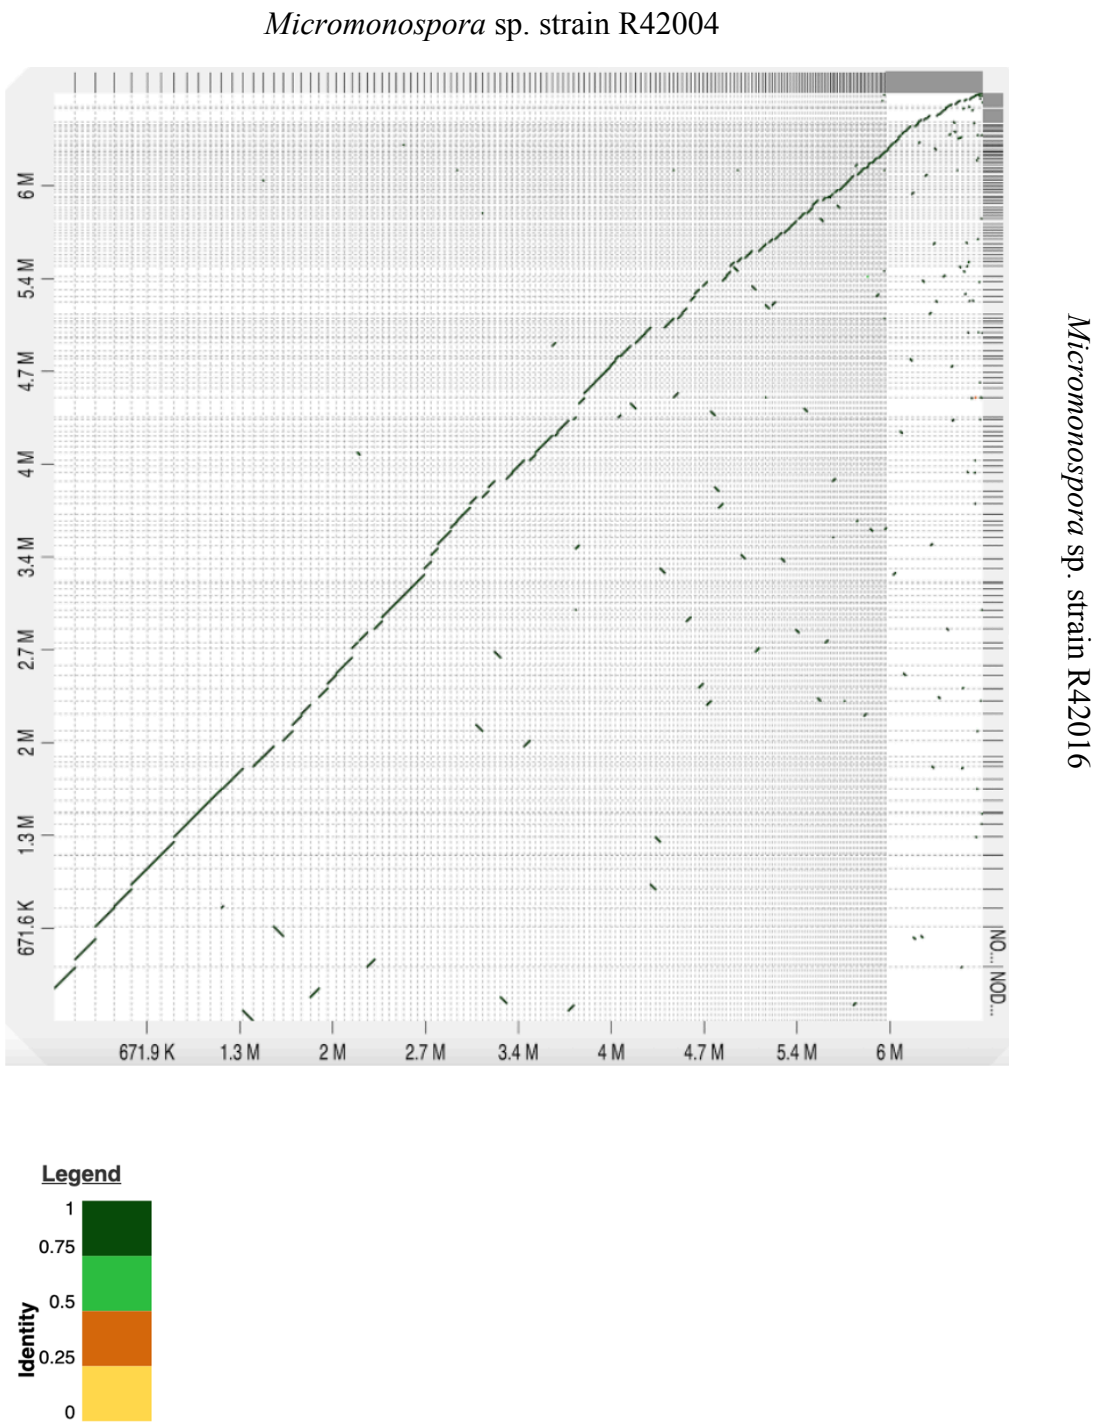



Supplementary Figure 5. Genome dot plot comparing *Micromonospora* spp. strains R42003 and R42106.

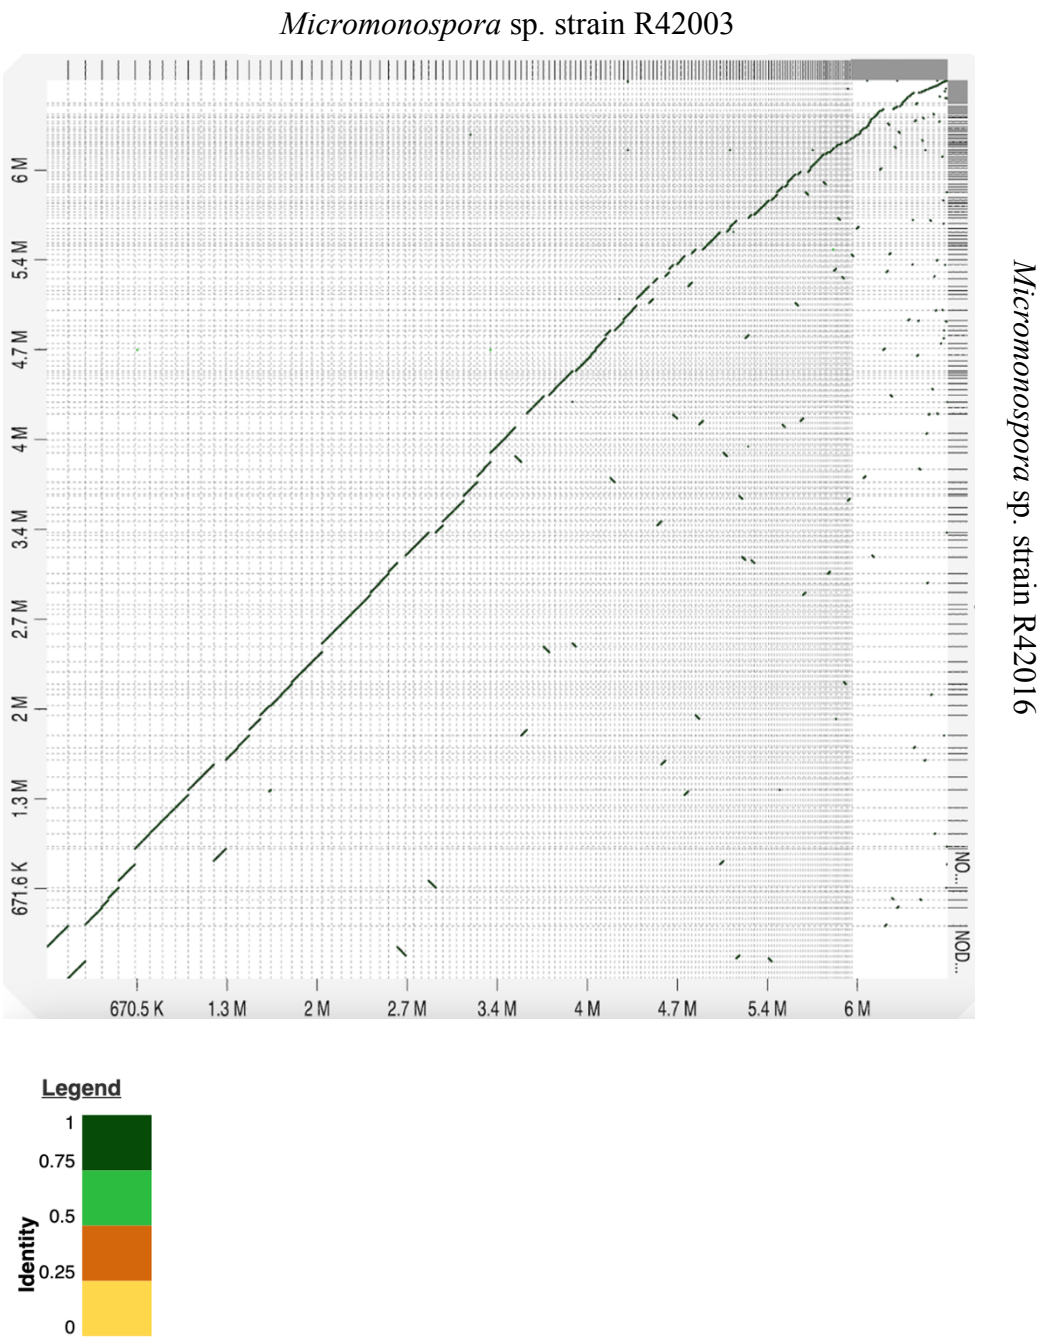

Supplementary Figure 6. Genome dot plot comparing *Micromonospora* spp. strains R42003 and XM-20-01.

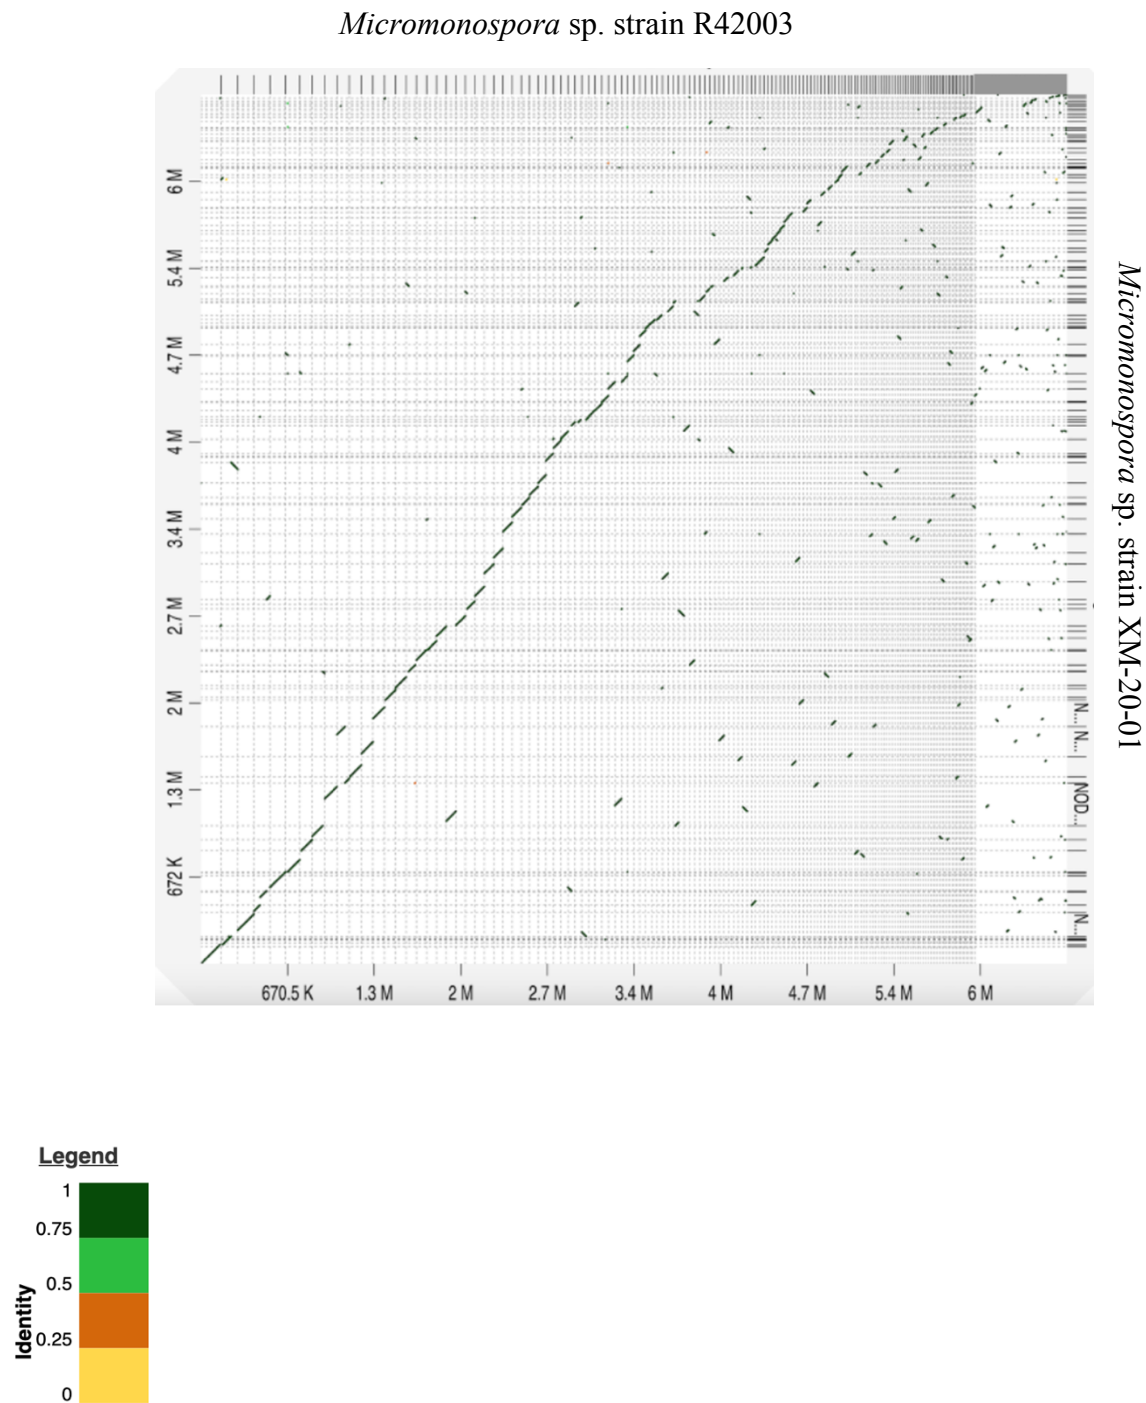

Supplementary Figure 7. Genome dot plot comparing *Micromonospora* spp. strains R42003 and R42004.

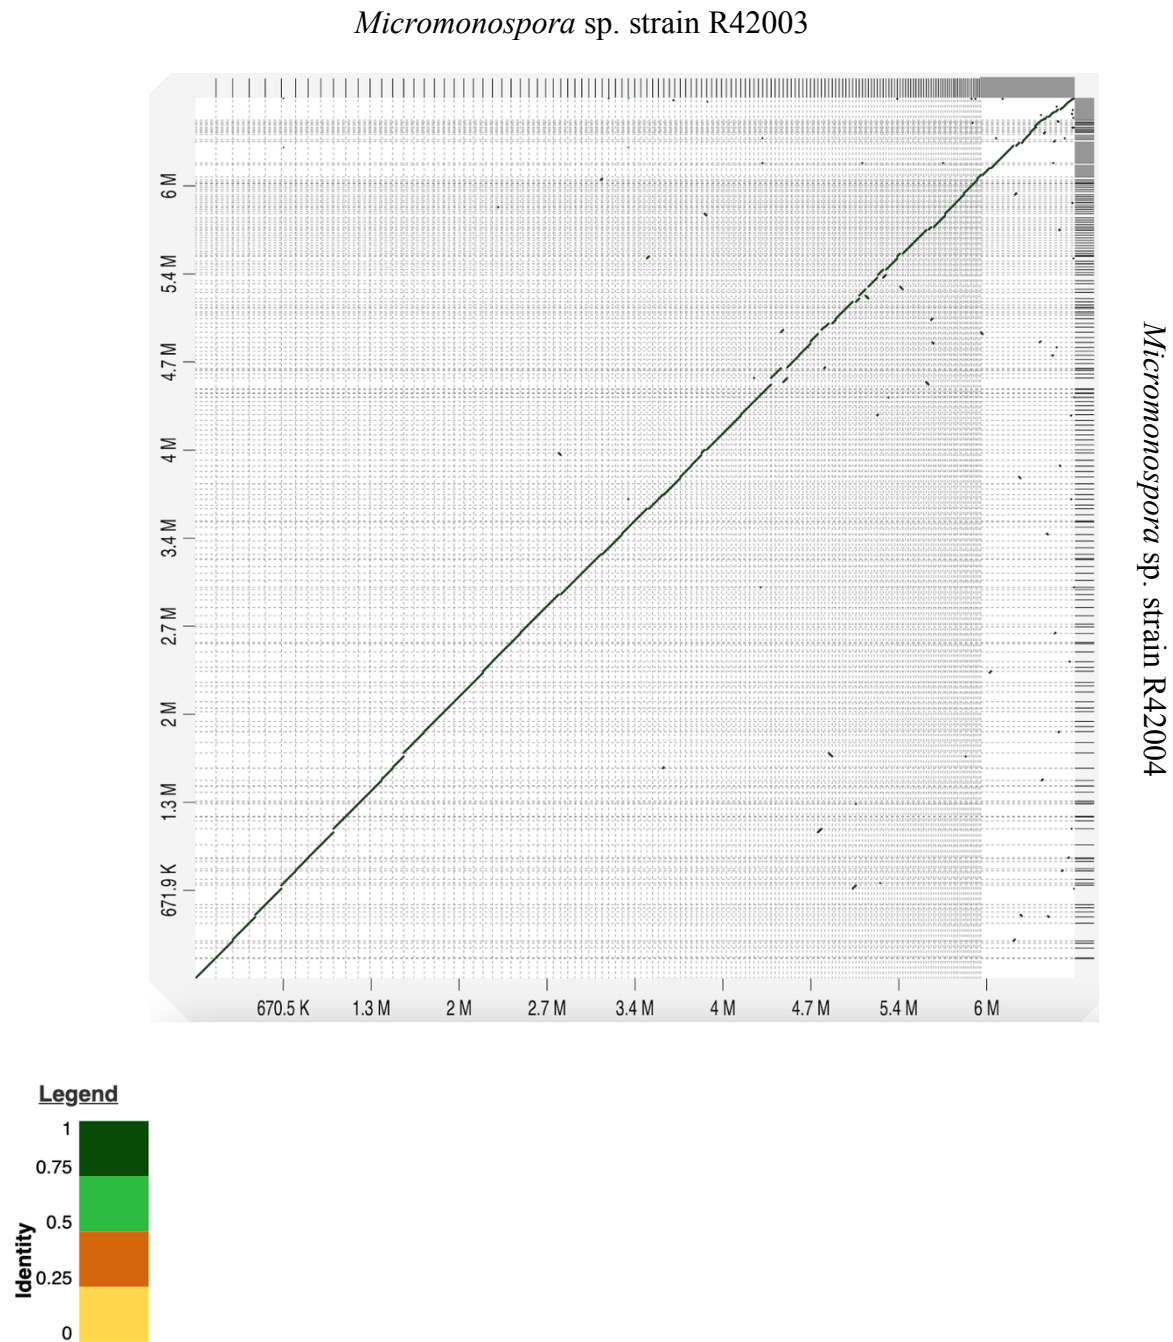

Supplement: Data_Sheet_2.PDF [file Data_Sheet_2.PDF]
