# Supplementary material for: Comparative analysis of assembly algorithms to optimize biosynthetic gene cluster identification in novel marine actinomycete genomes
Source: Frontiers journal article supplement (doi:10.3389/fmars.2022.914197), 2022-07-29
Supplement: Data_Sheet_1.docx [file Data_Sheet_1.docx]

**Information regarding WGS submissions to GenBank**

Nine strains pertaining to BioProject (PRJNA820852) have the following accession numbers:

       BioSample               Accession                 Organism
-----------------------------------------------------------------------------------
        SAMN27022271    JALLGK000000000     *Streptomyces* sp. XM4193
        SAMN27022270    JALLGL000000000     *Streptomyces* sp. XM83C
        SAMN27022269    JALLGM000000000  *Streptomyces* sp. XM4011
        SAMN27022268    JALLGN000000000    *Brevibacterium* sp. R8603A2
        SAMN27022266    JALLGO000000000   *Micromonospora* sp. R42106
        SAMN27022265    JALLGP000000000  *Micromonospora* sp. R42004
        SAMN27022264    JALLGQ000000000  *Micromonospora* sp. R42003
        SAMN27022262    JALLGR000000000   *Micrococcus* sp. XM4230B
        SAMN27022261    JALLGS000000000    *Micrococcus* sp. XM4230A

The remaining two samples are updated versions linked to the BioProject (PRJNA543824):

   BioSample           Accession             Organism
-----------------------------------------------------------------------------------

SAMN11784335    VFYR00000000     *Brevibacterium* sp. XM4083

SAMN11784337    VFYQ00000000    *Micromonospora* sp. XM-20-01

Updated data availability statement:

           Only the best assembly as determined in this study for each actinomycete strain was deposited in GenBank. The bacterial strains used in this study pertain to two BioProjects. The Whole Genome Shotgun project of nine strains belonging to BioProject PRJNA820852 have been deposited at DDBJ/ENA/GenBank under the following accessions: *Streptomyces* sp. XM4193 (JALLGK000000000), *Streptomyces* sp. XM83C (JALLGL000000000), *Streptomyces* sp. XM4011 (JALLGM000000000), *Brevibacterium* sp. R8603A2 (JALLGN000000000), *Micromonospora* sp. R42106 (JALLGO000000000), *Micromonospora* sp. R42004 (JALLGP000000000), *Micromonospora* sp. R42003 (JALLGQ000000000), *Micrococcus* sp. XM4230B (JALLGR000000000), and *Micrococcus* sp. XM4230A (JALLGS000000000). The versions described in this paper are version XXXXXX010000000. The remaining two strains are updated versions associated with BioProject (PRJNA543824), with the Whole Genome Shotgun project deposited at DDBJ/ENA/GenBank under the following accessions: *Micromonospora*sp. strain XM-20-01 (VFYQ00000000) and *Brevibacterium*sp. strain XM4083 (VFYR00000000). The versions described in this paper are version XXXXXX020000000.

         Caveat: submitted assemblies are slightly modified for the following nine genomes: *Micrococcus*sp. strain XM4230B, *Micromonospora*sp. strain XM-20-01, *Micromonospora*sp. strain R42004, *Micromonospora*sp. strain R42106, *Brevibacterium*sp. strain R8603A2, *Streptomyces*sp. strain XM4011, *Streptomyces*sp. strain XM83C and *Streptomyces*sp. strain XM4193, as GenBank requires removal of all contigs below 200bp.
